# Supplementary material
Source: publisher site journal article supplement (https://www.kjim.org/upload/media/kjim-2018-312-suppl2.pdf)
Supplement: Supplementary file 1 [file kjim-2018-312-suppl2.pdf]

**Supplementary Table 2. Definition of comorbidities**

| Diagnosis                                      | ICD-10-CM code and definition                                                                                                                                                                                                                                                                                                                                                                                                      |
|------------------------------------------------|------------------------------------------------------------------------------------------------------------------------------------------------------------------------------------------------------------------------------------------------------------------------------------------------------------------------------------------------------------------------------------------------------------------------------------|
| Hypertension                                   | I10–I13, I15; and minimum 1 prescription of anti-hypertensive drug (thiazide, loop diuretics, aldosterone antagonist, alpha-/beta-blocker, calcium-channel blocker, angiotensin-converting enzyme inhibitor, angiotensin II receptor blocker)                                                                                                                                                                                      |
| Diabetes mellitus                              | <p>≥ 2 E11–E14: ≥ 1 E11–E14 and minimum 1 prescription of anti-diabetic drugs (sulfonylureas, metformin, meglitinides, thiazolidinediones, dipeptidyl peptidase-4 inhibitors, α-glucosidase inhibitors, meglitinides and insulin)</p> <p>Diabetes mellitus was defined based on at least two diagnostic codes or at least one claim per year for the prescription of anti-diabetic medication under diabetes diagnostic codes.</p> |
| Hyperlipidemia <sup>a</sup>                    | E78                                                                                                                                                                                                                                                                                                                                                                                                                                |
| Heart failure <sup>a</sup>                     | I50                                                                                                                                                                                                                                                                                                                                                                                                                                |
| Atrial fibrillation <sup>a</sup>               | I48                                                                                                                                                                                                                                                                                                                                                                                                                                |
| Chronic kidney disease (≥ severe) <sup>a</sup> | N18.4-5, N18.9                                                                                                                                                                                                                                                                                                                                                                                                                     |

ICD-10-CM, International Classification of Disease, 10th revision, Clinical Modification.

<sup>a</sup>All variables except hypertension and diabetes mellitus were defined when patients had one or more diagnoses during hospitalization or at outpatient clinic.
